# Supplementary material
Source: PubMed Central journal article supplement (PMC5266612)
Supplement: NIHMS660736-supplement-nano074002suppdata_pdf.pdf [file NIHMS660736-supplement-nano074002suppdata_pdf.pdf]

## Supporting Information

### Detection of Benzo[a]pyrene-Guanine Adducts in Single-Stranded DNA using the $\alpha$ -Hemolysin Nanopore

*Rukshan T. Perera, Aaron M. Fleming, Robert P. Johnson, Cynthia J. Burrows,\* and Henry S. White\**

Department of Chemistry, University of Utah, 315 South 1400 East,

Salt Lake City, Utah 84112-0850, USA

\*To whom correspondence should be addressed. Email: [burrows@chem.utah.edu](mailto:burrows@chem.utah.edu) or [white@chem.utah.edu](mailto:white@chem.utah.edu)

| <b>Contents</b>                                                                    | <b>Page</b> |
|------------------------------------------------------------------------------------|-------------|
| 1. Characterization of the 4-mer and 41-mer BPDE DNA oligomers                     | S2          |
| 2. <i>i-t</i> traces for the unmodified 41-mer and 41-mer BPDE in 1 M KCl          | S3-4        |
| 3. <i>i-t</i> traces profile for the unmodified 41-mer and 41-mer BPDE in 3 M NaCl | S5-6        |
| 4. Translocation analyses of the 41-mer and 41-mer BPDE in 1M KCl                  | S7          |

## 1. Characterization of the 4-mer and 41-mer BPDE DNA oligomers

HPLC was used to purify the adduct (4-mer BPDE and 41-mer BPDE) from the reaction mixture. Four product peaks are observed for the 4-mer, and these correspond to the four diastereomers of BPDE. For the 41-mer only one product peak was observed containing all four diastereomers.

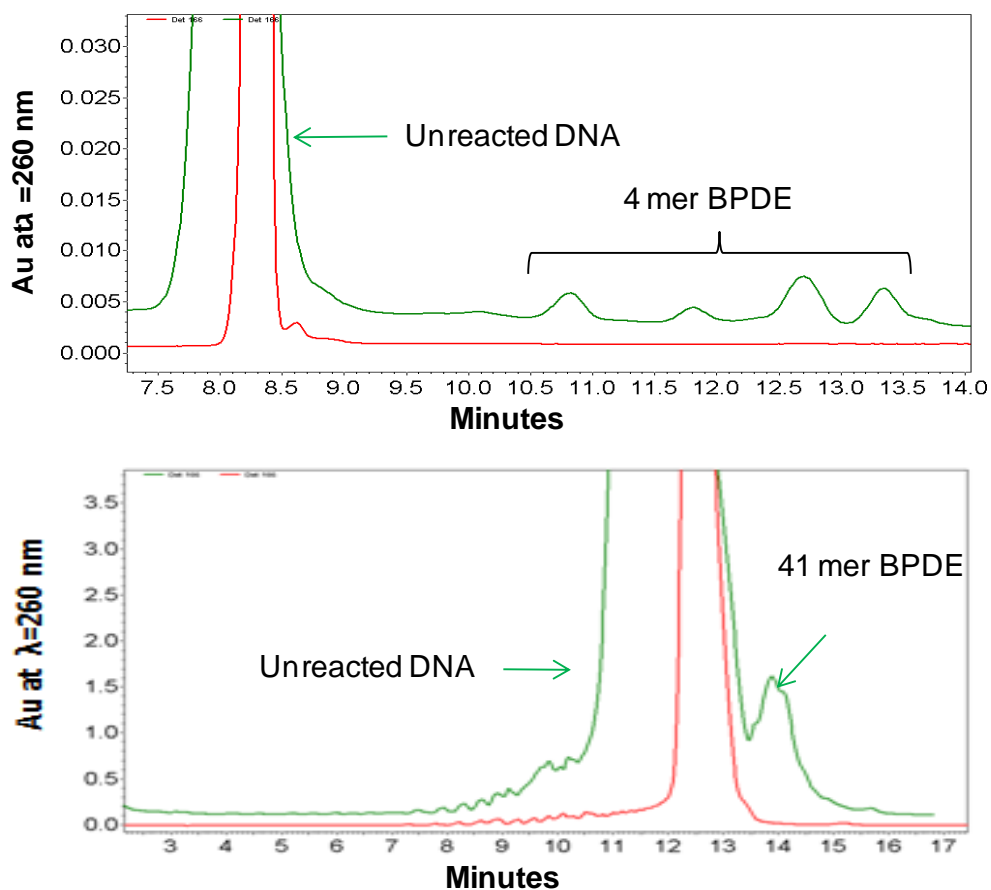

**Figure S1.** Ion-exchange HPLC traces for 4 mer-BPDE and 41-mer BPDE: The HPLC conditions utilized solvent A = 10% CH<sub>3</sub>CN, 90% ddH<sub>2</sub>O; B = 1 M NaCl in 10% CH<sub>3</sub>CN 90% ddH<sub>2</sub>O, 25 mM Tris pH 8; flow rate = 1 mL/min while monitoring the absorbance at 260 nm. The separation was initiated at 15% B followed by a linear increase to 100% B over 30 min.

## 2. $i-t$ traces for the unmodified 41-mer and 41-mer BPDE in 1 M KCl

Open channel baseline current intervals longer than 20 ms were removed from the following  $i-t$  traces and indicated by the blue dashed lines.

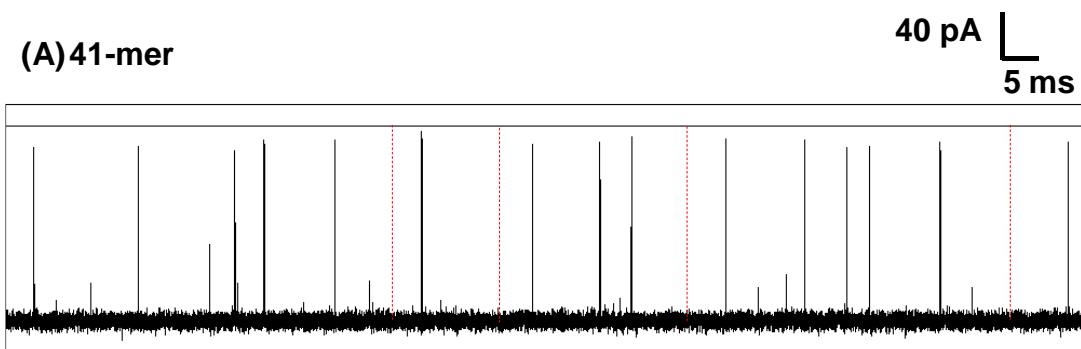

**Figure S2.** (A) Current vs. time profile for the 41-mer standard ( $4 \mu\text{M}$ ) in 1 M KCl. The data were recorded at 180 mV (*trans* vs. *cis*) at  $25.0 \pm 0.5 \text{ }^\circ\text{C}$ .

**(B) 41-mer BPDE**

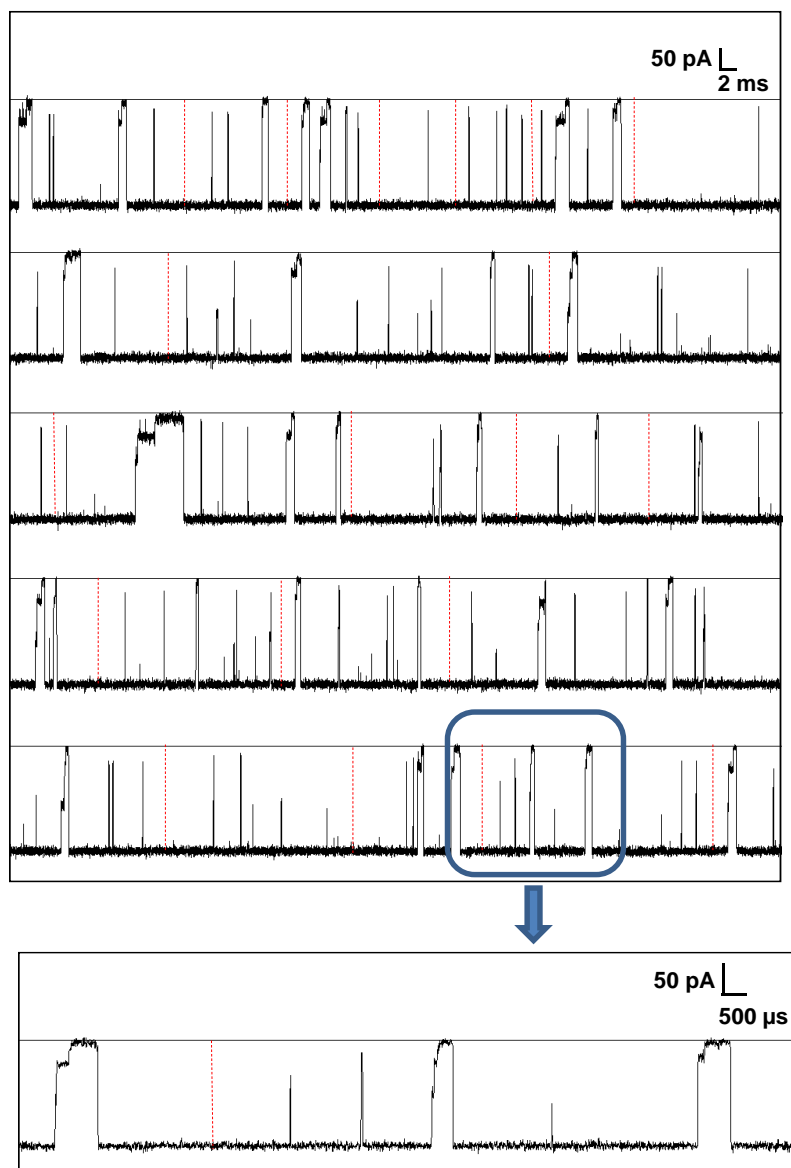

**Figure S2.** (B) Current vs. time profile for 41-mer BPDE (2 μM) in 1 M KCl. The data were recorded at 180 mV (*trans* vs. *cis*) at 25.0 ± 0.5 °C.

### 3. Current vs. time profile for the unmodified 41-mer and 41-mer BPDE in 3 M NaCl.

Open channel baseline current intervals longer than 20 ms were removed from the following  $i-t$  traces and indicated by the blue dashed lines.

#### (A) 41-mer

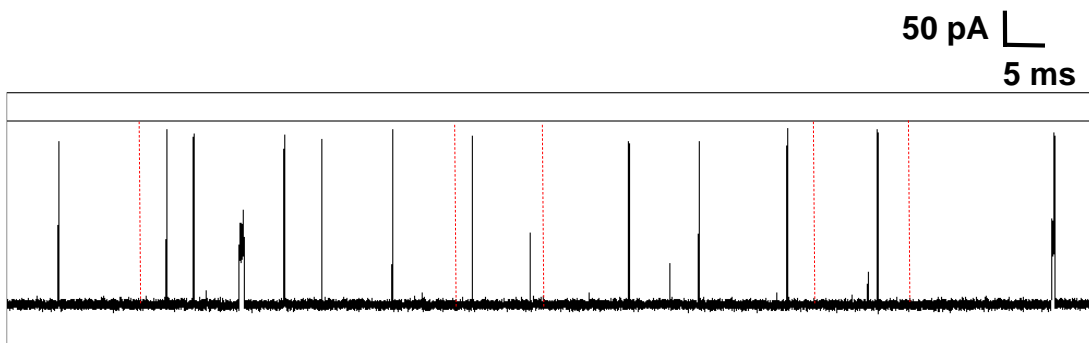

**Figure S3.**(A) Current vs. time profile for the 41-mer standard (4  $\mu$ M) in 3 M NaCl. The data were recorded at 180 mV (*trans* vs. *cis*) at  $25.0 \pm 0.5$  °C.

**(B) 41-mer BPDE**

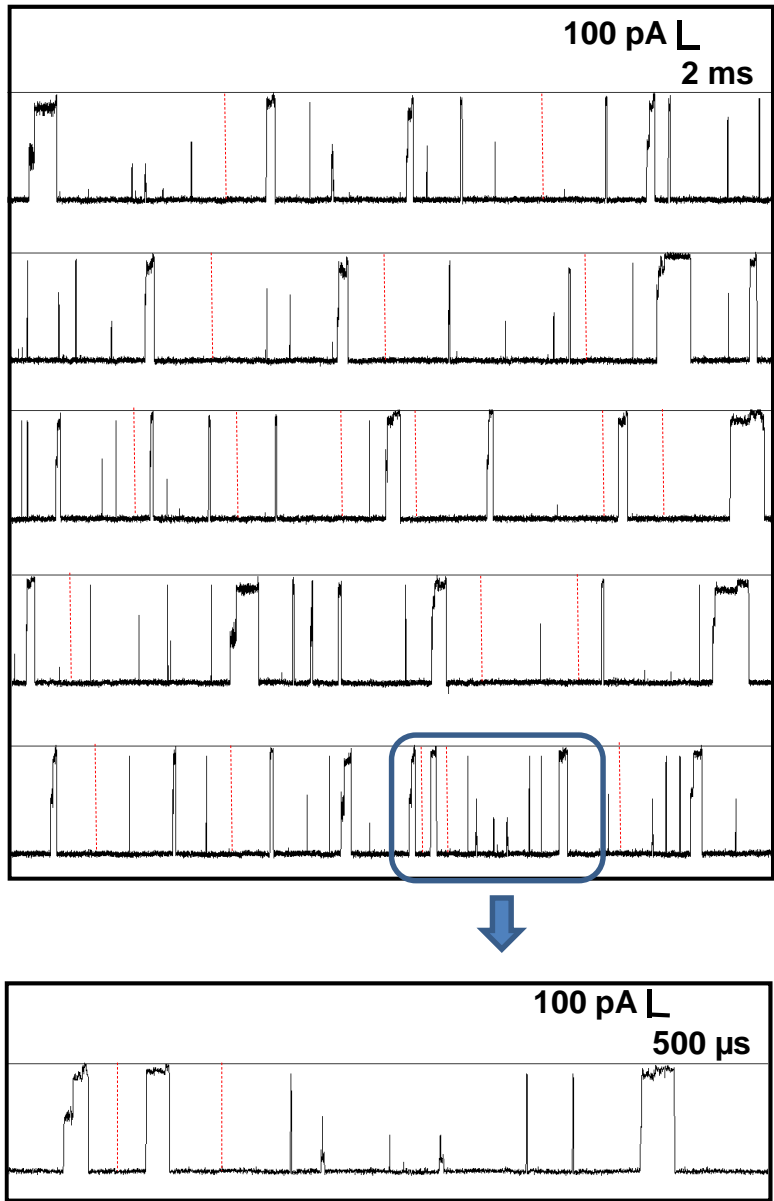

**Figure S3.(B)** Current vs. time profile for the 41-mer BPDE ( $2 \mu\text{M}$ ) in 3 M NaCl. The data were recorded at 180 mV (*trans* vs. *cis*) at  $25.0 \pm 0.5 \text{ }^\circ\text{C}$ .

#### 4. Translocation analysis of the 41-mer and 41-mer BPDE in 1 M KCl and 3 M NaCl

The translocation time durations for (A) 41-mer and (B) 41-mer BPDE in 1 M KCl are shown below. The time distribution for translocation of 41-mer was fit with a Gaussian model. The modified 41-mer BPDE showed longer translocation times (325-375 events were analyzed), and its duration histogram exhibits an exponential decay.

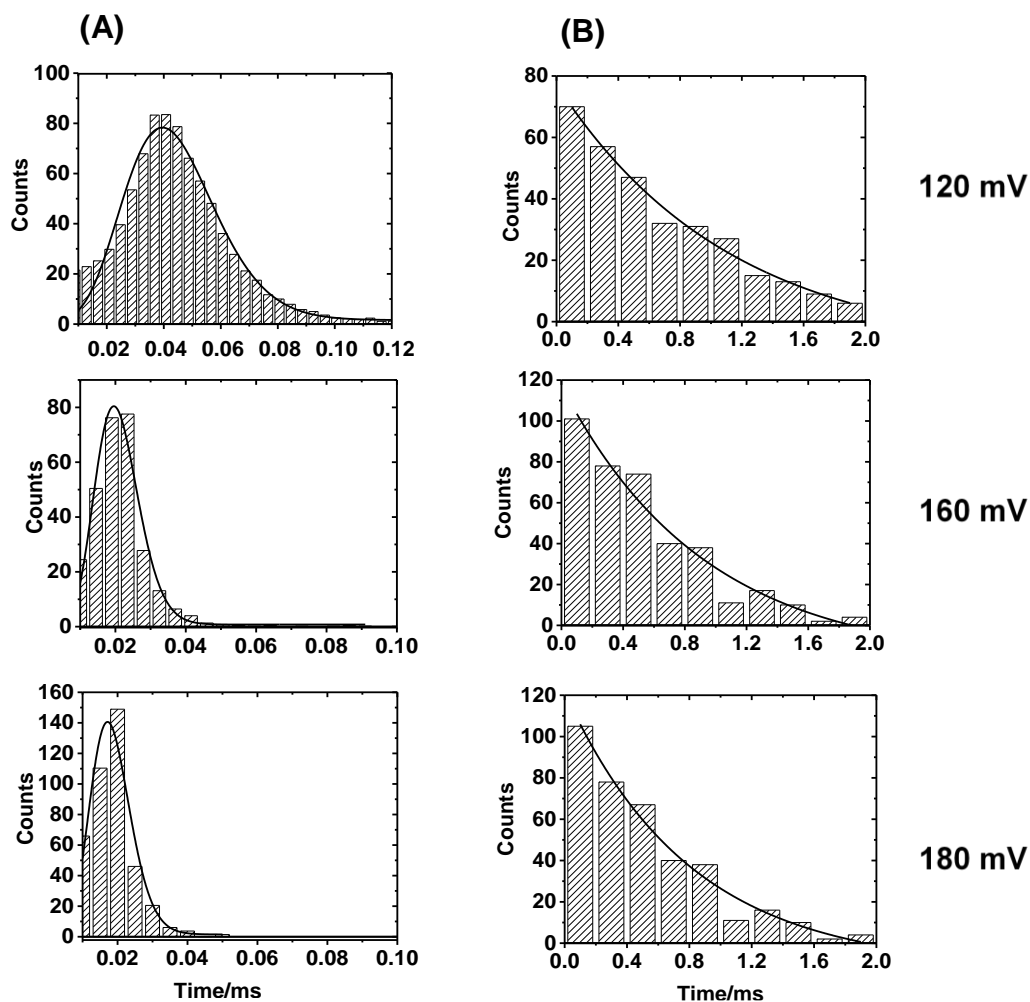

**Figure S4.** Translocation time analysis of the 41-mer and 41-mer BPDE in 1 M KCl. Only the events longer than 70  $\mu$ s were used for translocation analysis of 41-BPDE. The data were recorded at 120, 160 and 180 mV (*trans* vs. *cis*) at  $25.0 \pm 0.5$   $^{\circ}$ C.
